# Supplementary material for: Sex Differences in the Association Between Measures of General and Central Adiposity and the Risk of Myocardial Infarction: Results From the UK Biobank
Source: PubMed Central journal article supplement (PMC5866342; doi:10.1161/jaha.117.008507), 2018-02-28
Supplement: JAH3-7-e008507-s001.pdf [file JAH3-7-e008507-s001.pdf]

# **SUPPLEMENTAL MATERIAL**

**Table S1. Sex-specific mean differences (standard deviation) in body size measures between the baseline assessment and first repeat assessment.**

|                                          | <b>Women</b> | <b>Men</b>  |
|------------------------------------------|--------------|-------------|
| <b>N</b>                                 | 10,374       | 9,903       |
| <b>Body mass index, kg/m<sup>2</sup></b> | 0.06 (1.94)  | 0.09 (1.52) |
| <b>Waist circumference, cm</b>           | 2.03 (7.08)  | 1.53 (6.60) |
| <b>Hip circumference, cm</b>             | 0.58 (5.80)  | 0.57 (4.74) |
| <b>Standing height, cm</b>               | 0.62 (1.10)  | 0.56 (1.11) |
| <b>Weight, kg</b>                        | 0.39 (5.10)  | 0.25 (4.63) |
| <b>Waist-to-hip ratio</b>                | 0.02 (0.06)  | 0.01 (0.05) |
| <b>Waist-to-height ratio</b>             | 0.02 (0.04)  | 0.01 (0.04) |

**Table S2. Sex-specific association of body mass index, waist circumference, waist-to-hip ratio, and waist-to-height ratio with incident MI.**

|       | Body mass index       |                   |                   |                   |                   |                     |                     |         |
|-------|-----------------------|-------------------|-------------------|-------------------|-------------------|---------------------|---------------------|---------|
|       | <20                   | 20-25             | 25-30             | 30-35             | >35               | Per sex-specific SD | Per sex-combined SD | P-value |
| Women | 0.98 (0.63; 1.32)     | 1.00 (0.89; 1.11) | 1.28 (1.19; 1.37) | 1.59 (1.47; 1.71) | 1.96 (1.81; 2.12) | 1.24 (1.18; 1.31)   | 1.22 (1.17; 1.28)   | 0.15    |
| Men   | 2.72 (2.36; 3.08)     | 2.68 (2.60; 2.77) | 3.49 (3.44; 3.54) | 4.68 (4.61; 4.75) | 5.49 (5.37; 5.62) | 1.24 (1.20; 1.28)   | 1.28 (1.23; 1.32)   |         |
|       | Waist circumference   |                   |                   |                   |                   |                     |                     |         |
|       | <78                   | 78-86             | 86-93             | 93-101            | >101              |                     |                     |         |
| Women | 0.91 (0.79; 1.02)     | 1.00 (0.88; 1.12) | 1.22 (1.09; 1.35) | 1.57 (1.44; 1.70) | 2.18 (2.05; 2.30) | 1.32 (1.25; 1.39)   | 1.35 (1.28; 1.42)   | 0.048   |
| Men   | 2.03 (1.77; 2.28)     | 2.59 (2.48; 2.71) | 2.95 (2.87; 3.03) | 3.36 (3.30; 3.43) | 4.35 (4.29; 4.40) | 1.23 (1.19; 1.27)   | 1.28 (1.23; 1.33)   |         |
|       | Waist-to-hip ratio    |                   |                   |                   |                   |                     |                     |         |
|       | <0.79                 | 0.79-0.84         | 0.84-0.90         | 0.90-0.95         | >0.95             |                     |                     |         |
| Women | 0.72 (0.59; 0.84)     | 1.00 (0.90; 1.10) | 1.27 (1.16; 1.38) | 1.75 (1.62; 1.89) | 2.24 (2.06; 2.42) | 1.36 (1.30; 1.44)   | 1.49 (1.39; 1.59)   | 0.001   |
| Men   | 2.31 (1.84; 2.79)     | 1.91 (1.72; 2.11) | 2.54 (2.45; 2.63) | 2.88 (2.82; 2.95) | 3.78 (3.73; 3.83) | 1.25 (1.21; 1.29)   | 1.36 (1.30; 1.43)   |         |
|       | Waist-to-height ratio |                   |                   |                   |                   |                     |                     |         |
|       | <0.47                 | 0.47-0.51         | 0.51-0.55         | 0.55-0.59         | >0.59             |                     |                     |         |
| Women | 0.90 (0.79; 1.02)     | 1.00 (0.88; 1.12) | 1.22 (1.09; 1.35) | 1.57 (1.44; 1.71) | 2.18 (2.06; 2.31) | 1.36 (1.29; 1.43)   | 1.34 (1.27; 1.40)   | 0.38    |
| Men   | 2.09 (1.92; 2.25)     | 2.49 (2.39; 2.59) | 3.12 (3.04; 3.20) | 3.55 (3.49; 3.62) | 4.67 (4.61; 4.73) | 1.28 (1.24; 1.33)   | 1.33 (1.28; 1.38)   |         |

Analyses are adjusted for age, Townsend deprivation index, and smoking status and excluded the first 2 years of follow-up

**Table S3. Sex-specific hazard ratios, with 95% confidence intervals, for MI associated with a 1-SD increase in adiposity measures, by age, socioeconomic status, and body mass index.**

|                                    | Women             | Men               | P-value for interaction by sex |
|------------------------------------|-------------------|-------------------|--------------------------------|
| <b>Body mass index</b>             |                   |                   |                                |
| Age, years                         |                   |                   |                                |
| <60                                | 1.28 (1.19; 1.37) | 1.30 (1.23; 1.37) | 0.70                           |
| ≥60                                | 1.20 (1.13; 1.27) | 1.26 (1.20; 1.32) | 0.22                           |
| Socioeconomic status               |                   |                   |                                |
| Lower SES                          | 1.20 (1.12; 1.28) | 1.30 (1.23; 1.37) | 0.04                           |
| Higher SES                         | 1.26 (1.18; 1.34) | 1.27 (1.21; 1.33) | 0.76                           |
| <b>Waist circumference</b>         |                   |                   |                                |
| Age, years                         |                   |                   |                                |
| <60                                | 1.48 (1.35; 1.61) | 1.33 (1.25; 1.41) | 0.04                           |
| ≥60                                | 1.30 (1.22; 1.40) | 1.28 (1.21; 1.35) | 0.51                           |
| Socioeconomic status               |                   |                   |                                |
| Lower SES                          | 1.32 (1.22; 1.44) | 1.34 (1.27; 1.43) | 0.95                           |
| Higher SES                         | 1.37 (1.28; 1.48) | 1.25 (1.18; 1.31) | 0.02                           |
| Body mass index, kg/m <sup>2</sup> |                   |                   |                                |
| <25                                | 1.37 (1.11; 1.68) | 1.18 (1.00; 1.41) | 0.19                           |
| ≥25                                | 1.36 (1.27; 1.47) | 1.24 (1.18; 1.31) | 0.02                           |
| <b>Waist-to-hip ratio</b>          |                   |                   |                                |
| Age, years                         |                   |                   |                                |
| <60                                | 1.74 (1.56; 1.94) | 1.45 (1.36; 1.54) | 0.002                          |
| ≥60                                | 1.44 (1.33; 1.56) | 1.37 (1.29; 1.46) | 0.17                           |
| Socioeconomic status               |                   |                   |                                |
| Lower SES                          | 1.50 (1.36; 1.66) | 1.45 (1.34; 1.56) | 0.17                           |
| Higher SES                         | 1.49 (1.36; 1.62) | 1.32 (1.24; 1.40) | 0.005                          |
| Body mass index, kg/m <sup>2</sup> |                   |                   |                                |
| <25                                | 1.42 (1.23; 1.65) | 1.31 (1.16; 1.47) | 0.11                           |
| ≥25                                | 1.46 (1.35; 1.59) | 1.31 (1.23; 1.39) | 0.002                          |
| <b>Waist-to-height ratio</b>       |                   |                   |                                |
| Age, years                         |                   |                   |                                |
| <60                                | 1.46 (1.36; 1.58) | 1.40 (1.32; 1.48) | 0.33                           |
| ≥60                                | 1.30 (1.23; 1.38) | 1.33 (1.27; 1.40) | 0.81                           |
| Socioeconomic status               |                   |                   |                                |
| Lower SES                          | 1.33 (1.24; 1.42) | 1.39 (1.31; 1.47) | 0.56                           |
| Higher SES                         | 1.35 (1.27; 1.44) | 1.30 (1.24; 1.37) | 0.21                           |
| Body mass index, kg/m <sup>2</sup> |                   |                   |                                |
| <25                                | 1.43 (1.19; 1.72) | 1.59 (1.33; 1.89) | 0.93                           |
| ≥25                                | 1.37 (1.29; 1.46) | 1.30 (1.24; 1.36) | 0.06                           |

Analyses are adjusted for age, Townsend deprivation index, and smoking status and excluded the first 2 years of follow-up. SES, socioeconomic status. The UK median Townsend deprivation index of -0.56 was used to categorise individuals as 'Lower (> -0.56)' or 'Higher (≤ -0.56)' SES.
